# Supplementary material for: Collapse of Insect Gut Symbiosis under Simulated Climate Change
Source: PubMed Central journal article supplement (PMC5050343; doi:10.1128/mbio.01578-16), 2016-10-04
Supplement: mbo005163011sf1.pdf [file mbo005163011sf1.pdf]

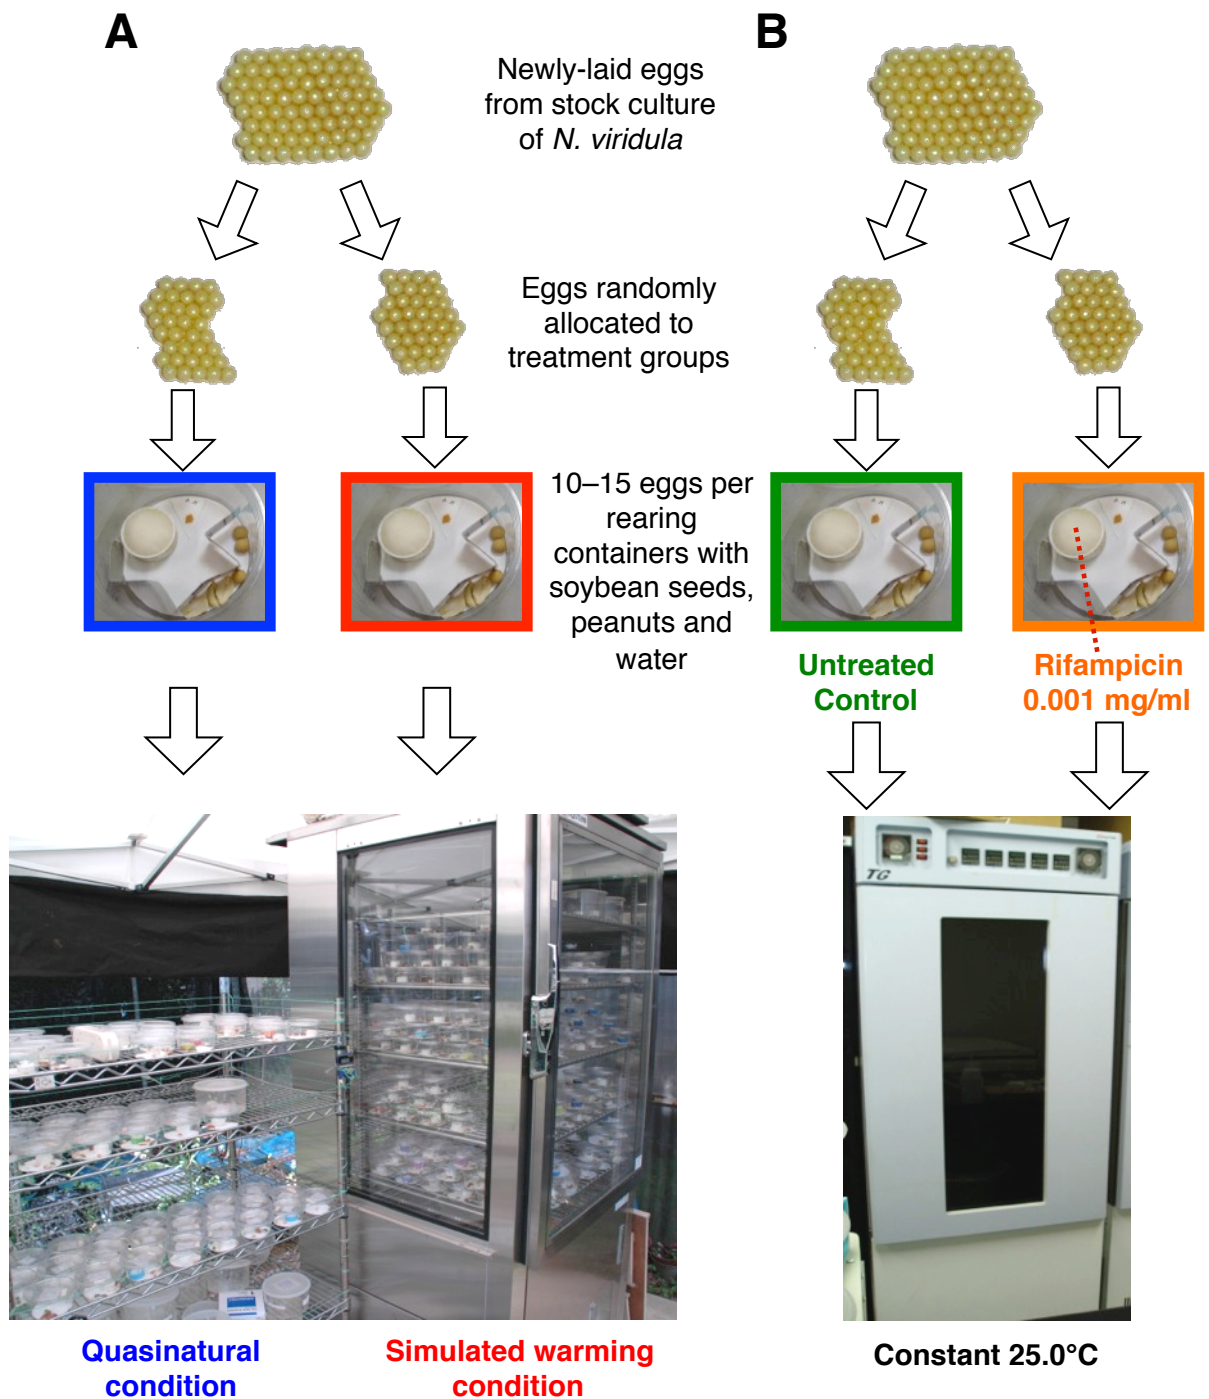

FIG S1 Experimental design. (A) In the simulated warming experiment, each egg mass of *N. viridula* was divided into two parts and allocated to either the quasinatural condition or the simulated warming condition (+ 2.5°C). (B) In the antibiotic experiment, each egg mass was divided into two parts and allocated to either the nontreated control group or the rifampicin-treated group.
