# Supplementary material for: Collapse of Insect Gut Symbiosis under Simulated Climate Change
Source: PubMed Central journal article supplement (PMC5050343; doi:10.1128/mbio.01578-16), 2016-10-04
Supplement: mbo005163011sf4.pdf [file mbo005163011sf4.pdf]

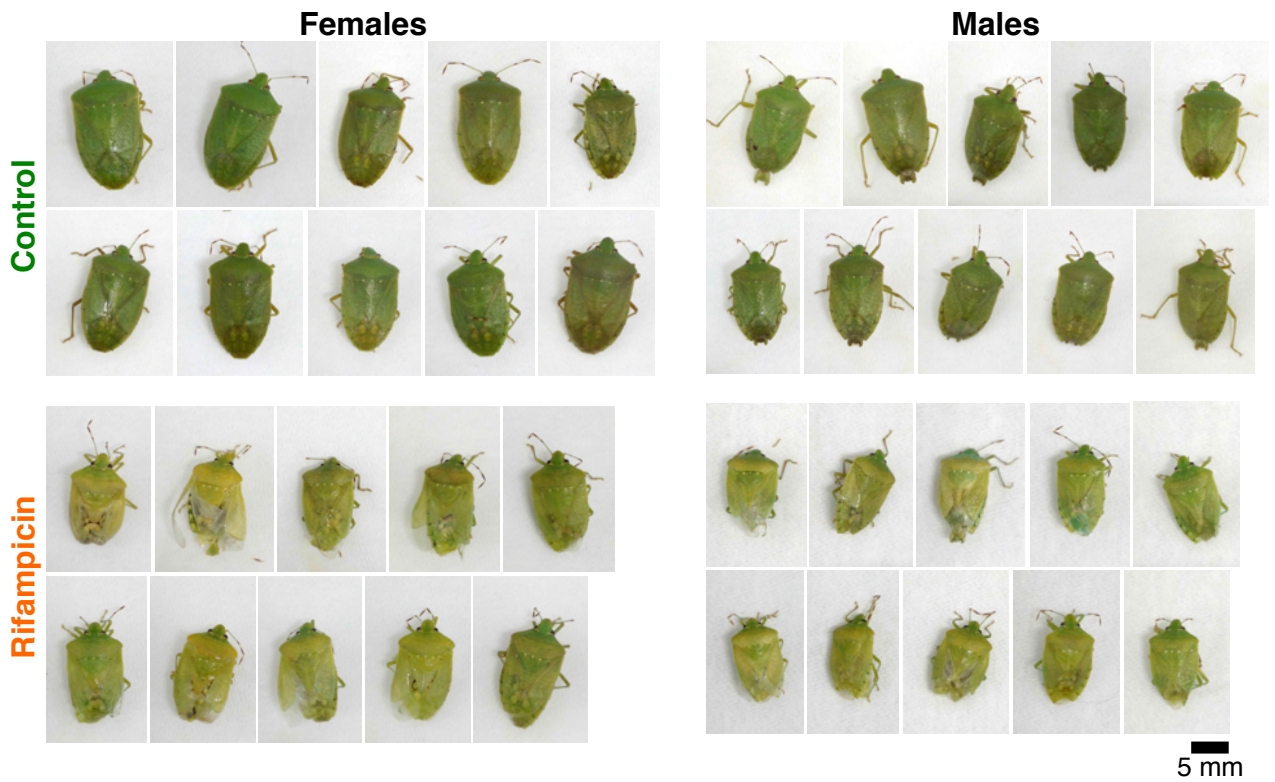

FIG S4 Effect of antibiotic treatment on body coloration of *N. viridula*. Female and male insects were reared with distilled water (control) or rifampicin-containing distilled water (rifampicin). Note that the insects treated with the antibiotic show smaller body size and abnormal body color.
